# Supplementary material
Source: ML conference proceedings conference paper supplement (https://openreview.net/forum?id=ascdLuNQY4J)
Supplement: supplementary_material [file attachment]

# Calculus

June 7, 2017

$$U_{mn}^l(\alpha, \beta, \gamma) = e^{im\alpha} d_{mn}^l(\beta) e^{in\gamma}$$

I require  $d^{mn}$  to **be real** and satisfy the following equation:

$$\int_0^\pi \frac{d\beta \sin(\beta)}{2} d_{mn}^l(\beta) d_{mn}^{l'}(\beta) = \frac{\delta_{ll'}}{2l+1} \quad (1)$$

From the two last equations we deduce

$$\begin{aligned} \int_0^{2\pi} \frac{d\alpha}{2\pi} \int_0^\pi \frac{d\beta \sin(\beta)}{2} \int_0^{2\pi} \frac{d\gamma}{2\pi} U_{mn}^l(\alpha, \beta, \gamma) U_{m'n'}^{l'}(\alpha, \beta, \gamma)^* \\ = \frac{\delta_{ll'} \delta_{mm'} \delta_{nn'}}{2l+1} \end{aligned} \quad (2)$$

This equality gives the Fourier transform

$$\begin{aligned} [\mathcal{F}(f)]_{mn}^l &= \sum_{l'=0}^{\infty} \sum_{m', n'=-l'}^{l'} [\mathcal{F}(f)]_{m'n'}^{l'} \delta_{ll'} \delta_{mm'} \delta_{nn'} \\ &= \int dg \underbrace{\sum_{l'm'n'} [\mathcal{F}(f)]_{m'n'}^{l'} U_{m'n'}^{l'}(g) (2l+1) U_{mn}^l(g)^*}_{f(g)} \end{aligned} \quad (3)$$

Or with the Haar measure explicit:

$$\begin{aligned}
[\mathcal{F}(f)]_{mn}^l &= \int_0^{2\pi} \frac{d\alpha}{2\pi} \int_0^\pi \frac{d\beta \sin(\beta)}{2} \int_0^{2\pi} \frac{d\gamma}{2\pi} e^{-im\alpha} d_{mn}^l(\beta) e^{-in\gamma} f(\alpha, \beta, \gamma) \\
&= \int_0^\pi \frac{d\beta \sin(\beta)}{2} d_{mn}^l(\beta) \left\{ \int_0^{2\pi} \frac{d\alpha}{2\pi} \int_0^{2\pi} \frac{d\gamma}{2\pi} e^{-im\alpha} e^{-in\gamma} f(\alpha, \beta, \gamma) \right\}
\end{aligned} \tag{4}$$

$$\begin{aligned}
f(\alpha, \beta, \gamma) &= \sum_{l=0}^{\infty} \sum_{m,n=-l}^l [\mathcal{F}(f)]_{mn}^l d_{mn}^l(\beta) (2l+1) e^{im\alpha} e^{in\gamma} \\
&= \sum_{(m,n) \in \mathbb{Z}^2} \left\{ \sum_{l=\max(|m|, |n|)}^{\infty} [\mathcal{F}(f)]_{mn}^l d_{mn}^l(\beta) (2l+1) \right\} e^{im\alpha} e^{in\gamma} \quad (5)
\end{aligned}$$

Rotation

$$L_h f(g) = f(h^{-1}g)$$

$U$  is a unitary representation of  $\text{SO}(3)$

$$\begin{aligned}
U^l(gh) &= U^l(g)U^l(h) \\
U^l(g^{-1}) &= U^l(g)^\dagger
\end{aligned}$$

$$\begin{aligned}
[\mathcal{F}(L_h f)]_{mn}^l &= \int_g f(h^{-1}g) U_{mn}^l(g)^* = \int_g f(g) U_{mn}^l(hg)^* \\
&= \sum_i U_{mi}^l(h)^* \int_g f(g) U_{in}^l(g)^* = \sum_i U_{mi}^l(h)^* [\mathcal{F}(f)]_{in}^l \quad (6)
\end{aligned}$$

Convolution

$$(f_1 * f_2)(g) = \int dh f_1(h) f_2^*(g^{-1}h)$$

$$\begin{aligned}
[\mathcal{F}(f_1 * f_2)]^l &= \int dg U^l(g)^* \int dh f_1(h) f_2^*(g^{-1}h) \\
&= \int dg \int dh U^l(g^{-1})^* f_1(h) f_2^*(gh) \\
&= \int dg \int dh U^l(hg^{-1})^* f_1(h) f_2^*(g) \\
&= \int dg \int dh U^l(h)^* U^l(g^{-1})^* f_1(h) f_2^*(g) \\
&= \int dg \int dh U^l(h)^* U^l(g)^T f_1(h) f_2^*(g) \\
&= \left( \int dh U^l(h)^* f_1(h) \right) \left( \int dg U^l(g)^T f_2^*(g) \right) \\
&= [\mathcal{F}f_1]^l [\mathcal{F}f_2]^{l\dagger} \quad (7)
\end{aligned}$$
